# Supplementary material for: Lower-risk substance use guidelines accessible by youth
Source: Subst Abuse Treat Prev Policy. 2023 Feb 13;18:10. doi: 10.1186/s13011-023-00516-3 (PMC9926657; doi:10.1186/s13011-023-00516-3)
Supplement: Supplementary file 1 — Additional file 1: Supplemental Table 1. Key Search Terms. [file 13011_2023_516_MOESM1_ESM.docx]

**Supplemental Table 1. Key Search Terms**

|  | |
| --- | --- |
| Search Term Used | Drug Name |
| How to Use Cannabis | Cannabis |
| How to Use Cannabis Youth |
| Low-Risk Cannabis Use |
| Low-Risk Cannabis Use Youth |
| Safe Cannabis Use |
| Safe Cannabis Use Youth |
| Cannabis Guidelines |
| Youth Cannabis Guidelines |
| How to Use Weed | Weed |
| How to Use Weed Youth |
| Low-Risk Weed Use |
| Low-Risk Weed Use Youth |
| Safe Weed Use |
| Safe Weed Use Youth |
| Weed Guidelines |
| Youth Weed Guidelines |
| How to Use Marijuana | Marijuana |
| How to Use Marijuana Youth |
| Low-Risk Marijuana Use |
| Low-Risk Marijuana Use Youth |
| Safe Marijuana Use |
| Safe Marijuana Use Youth |
| Marijuana Guidelines |
| Youth Marijuana Guidelines |
| How to Use Alcohol | Alcohol |
| How to Use Alcohol Youth |
| Low-Risk Alcohol Use |
| Low-Risk Alcohol Use Youth |
| Safe Alcohol Use |
| Safe Alcohol Use Youth |
| Alcohol Guidelines |
| Youth Alcohol Guidelines |
| How to Use Drinking | Drinking |
| How to Use Drinking Youth |
| Low-Risk Drinking |
| Low-Risk Drinking Youth |
| Safe Drinking |
| Safe Drinking Youth |
| Drinking Guidelines |
| Youth Drinking Guidelines |
| How to Use Caffeine | Caffeine |
| How to Caffeine Use Youth |
| Low-Risk Caffeine Use |
| Low-Risk Caffeine Use Youth |
| Safe Caffeine Use |
| Safe Caffeine Use Youth |
| Caffeine Guidelines |
| Youth Caffeine Guidelines |
| How to Use Energy Drinks | Energy Drinks |
| How to Use Energy Drinks Youth |
| Low-Risk Energy Drink Use |
| Low-Risk Energy Drink Use Youth |
| Safe Energy Drink Use |
| Safe Energy Drink Use Youth |
| Energy Drink Guidelines |
| Youth Energy Drink Guidelines |
| How to Use Prescription Opioids | Prescription Opioids |
| How to Use Prescription Opioids Youth |
| Low-Risk Prescription Opioid Use |
| Low-Risk Prescription Opioid Use Youth |
| Safe Prescription Opioid Use |
| Safe Prescription Opioid Use Youth |
| Prescription Opioid Guidelines |
| Youth Prescription Opioid Guidelines |
| How to Use Opioids | Opioids |
| How to Use Opioids Youth |
| Low-Risk Opioid Use |
| Low-Risk Opioid Use Youth |
| Safe Opioid Use |
| Safe Opioid Use Youth |
| Opioid Guidelines |
| Youth Opioid Guidelines |
| How to Use Prescription Stimulants | Prescription Stimulants |
| How to Use Prescription Stimulants Youth |
| Low-Risk Prescription Stimulant Use |
| Low-Risk Prescription Stimulant Use Youth |
| Safe Prescription Stimulant Use |
| Safe Prescription Stimulant Use Youth |
| Prescription Stimulant Guidelines |
| Youth Prescription Stimulant Guidelines |
| How to Use Stimulants | Stimulants |
| How to Use Stimulants Youth |
| Low-Risk Stimulant Use |
| Low-Risk Stimulant Use Youth |
| Safe Stimulant Use |
| Safe Stimulant Use Youth |
| Stimulant Guidelines |
| Youth Stimulant Guidelines |
| How to Smoke | Smoking |
| How to Smoke Youth |
| Low-Risk Smoking |
| Low-Risk Smoking Youth |
| Safe Smoking |
| Safe Smoking Youth |
| Smoking Guidelines |
| Youth Smoking Guidelines |
| How to Vape | Vaping |
| How to Vape Youth |
| Low-Risk Vaping Use |
| Low-Risk Vaping Use Youth |
| Safe Vaping |
| Safe Vaping Youth |
| Vaping Guidelines |
| Youth Vaping Guidelines |
| How to Use LSD | LSD |
| How to Use LSD Youth |
| Low-Risk LSD Use |
| Low-Risk LSD Use Youth |
| Safe LSD Use |
| Safe LSD Use Youth |
| LSD Guidelines |
| Youth LSD Guidelines |
| How to Use Acid | Acid |
| How to Use Acid Youth |
| Low-Risk Acid Use |
| Low-Risk Acid Use Youth |
| Safe Acid Use |
| Safe Acid Use Youth |
| Acid Guidelines |
| Youth Acid Guidelines |
| How to Use Magic Mushrooms | Magic Mushrooms |
| How to Use Magic Mushrooms Youth |
| Low-Risk Magic Mushroom Use |
| Low-Risk Magic Mushroom Use Youth |
| Safe Magic Mushroom Use |
| Safe Magic Mushroom Use Youth |
| Magic Mushroom Guidelines |
| Youth Magic Mushroom Guidelines |
| How to Use Psilocybin | Psilocybin |
| How to Use Psilocybin Youth |
| Low-Risk Psilocybin Use |
| Low-Risk Psilocybin Use Youth |
| Safe Psilocybin Use |
| Safe Psilocybin Use Youth |
| Psilocybin Guidelines |
| Youth Psilocybin Guidelines |

**Additional Files**

File Name: Lower-Risk Substance Use Guidelines for Youth - Guideline Coding Table – (Additional File 1)

File Format: .xlsx

Title of Data: Lower-Risk Substance Use Guidelines for Youth - Guideline Coding Table

Description of data: The dataset which was used to code and generate the information within **Table 2** (LRSUG Digital Assessment Results).
